# Supplementary material for: Single cell activity reveals direct electron transfer in methanotrophic consortia
Source: Springer Nature journal article supplement (doi:10.1038/nature15512), 2015-09-16
Supplement: 41586_2015_BFnature15512_MOESM316_ESM.xlsx [file 41586_2015_BFnature15512_MOESM316_ESM.xlsx]

## Sheet: FigE6a
Distance to nearest bacteria (um)	Normalized archaeal activity
2.6948	0.73468
1.9058	0.61325
2.0836	0.20053
2.0076	0.058958
3.0948	-0.69405
2.9788	-0.43509
4.0806	-1.3356
3.5261	-0.13376
2.6838	0.12068
3.2486	0.72598
1.9733	0.64319
3.7	-0.57115
3.0896	0.051522
2.3898	0.044096
3.0001	-0.60106
1.2716	0.18643
4.1548	-0.84313
4.7655	-0.65323
4.191	-0.64653
4.4725	-0.48936
5.3506	-0.77519
1.2516	-0.32606
1.4342	-0.62272
1.9894	-0.4957
1.1767	-0.42179
2.488	-0.77734
3.6084	-0.84037
3.2956	-0.47505
4.2792	-0.93384
2.6793	-0.71921
1.8316	-0.69619
1.127	-1.9032
2.5922	-1.0482
3.5059	-0.69691
4.7746	-0.48454
5.7325	-1.3608
4.4581	-1.7009
2.3673	0.22079
2.9899	-0.073121
2.5499	1.2393
2.7704	-0.65297
2.3839	1.1838
1.4317	-0.74233
1.9244	-0.19164
1.9916	0.56242
1.5971	0.58177
2.7235	0.34202
2.1717	2.6975
1.4627	0.79384
1.7365	0.15639
1.4777	1.4616
2.5188	2.7558
3.3345	2.3302
3.1427	1.4473
2.2226	0.38211
1.3322	-1.0295
0.94117	-0.85719
1.8482	-0.18088
2.6357	1.7023
2.5743	1.8121
3.0067	1.2378
1.3992	-0.29457
1.8272	0.61506
1.4583	-1.0583
1.3917	0.86027
1.5189	-1.5272
2.2268	-1.4638
1.6154	-1.2204
2.1089	-1.1753
1.3671	0.00013676
2.3547	0.37314
1.4814	-0.10709
1.8273	1.2092
1.791	-0.068058
2.0687	0.75587
2.3761	-0.78894
2.0121	0.25799
2.3273	-0.88619
1.6231	-1.0999
1.7078	-1.3886
1.7797	-0.83388
1.8461	0.83059
1.9012	-1.0659
3.6008	0.86488
1.7699	0.83601
2.1265	0.9246
2.2991	0.82943
2.4755	-1.3509
1.7539	0.7536
1.4857	0.6998
2.1255	-1.1209
2.1357	-1.3799
2.2558	1.032
1.4302	1.3133
1.9635	1.0915
2.5335	1.3853
1.6936	0.50394
2.2226	1.0547
1.4329	1.1757
1.6606	1.1971
2.0456	-0.48726
1.4938	1.0604
2.6026	-0.99619
2.7538	-0.87406
2.0563	-0.31479
1.9693	0.29259
2.1943	1.3917
2.6868	-0.25215
3.5693	0.1331
2.5083	-0.28851
4.8986	-1.0408
2.4635	-1.3784
2.8308	0.28832
4.4473	0.90926
3.5427	0.5844
6.7133	-0.49827
5.8157	-0.44799
5.0093	0.85833
6.491	1.1424
6.2011	0.10365
3.5186	1.5343
3.3209	2.4184
5.5813	-0.024358
2.9586	-0.73879
2.8024	-1.7122
5.9971	0.37039
6.3835	0.40683
7.8361	-0.89951
9.0438	0.33987
10.528	-1.724
11.14	-0.70126
9.241	0.21964
2.1343	-1.287
1.5832	-0.21739
1.4994	-0.34331
1.6621	0.25791
1.87	0.58327
1.6928	-1.0841
1.8934	0.58566
1.5442	0.48038
1.4937	0.69819
1.4692	1.6047
1.5374	-2.097
1.4763	-0.46834
1.6739	-1.3559
2.7264	-1.3297
1.9484	-1.5564
3.0529	-0.71186
1.8672	-0.046555
1.9789	0.6659
1.3549	-0.46346
1.6102	-1.4594
1.7549	1.1068
1.7998	1.219
1.7611	-0.70917
1.212	0.89849
1.886	0.090687
2.7017	0.066412
4.0811	-1.4287
1.5242	0.46065
2.6041	0.65092
2.2156	1.0903
2.4278	-0.92541
2.2213	-1.4104
2.0818	1.0114
2.1047	-0.2226
2.1421	-0.79995
1.6013	-0.39726
1.5393	0.66685
2.261	1.2578
2.22	0.9016
1.8824	1.1654
1.6768	0.58282
1.7341	-0.67333
1.9883	0.56785
1.4934	-0.26842
1.6334	-0.40114
1.6243	0.32605
2.1035	-1.4053
2.2154	-1.5686
1.8923	-0.81279
2.1962	-1.1826
1.3046	-0.81851
1.5277	-0.79225
1.1591	0.19488
1.8266	1.3389
1.298	1.4097
1.1824	1.0562
1.6055	1.7142
1.5398	1.3772
1.0784	0.91944
2.8708	0.51123
1.5587	-0.40713
2.9117	-2.2072
4.3317	-1.6105
6.7954	-0.12346
4.8479	-0.83635
2.588	-1.2196
6.4561	0.40555
3.6769	0.76716
2.2356	0.96834
5.2788	1.3793
6.6422	0.92138
2.9872	0.62196
4.5222	1.2981
5.8595	1.0511
4.2871	0.6508
5.6419	-0.099238
5.2831	0.88021
3.1931	0.34199
2.4478	-0.76858
5.1576	0.59057
5.0542	1.779
5.6602	0.55899
7.2238	0.54669
2.2642	0.61872
2.2022	0.69855
4.0076	-0.3939
2.8016	0.1485
4.941	-1.8632
6.4106	-0.036379
2.3504	1.6137
3.1353	0.51026
4.3879	-0.19874
6.5917	-2.4502
6.1044	-0.069473
7.2307	-0.28948
6.6693	0.49907
3.972	-0.54333
2.0738	0.21071
4.7254	0.91552
6.2973	0.37836
6.556	-0.9596
7.6817	0.035787
7.2414	-0.87576
5.9412	-0.53112
4.951	0.30135
4.6865	0.68174
5.0388	-2.0125
3.8415	-0.021758
2.5424	-1.3356
2.1187	-1.2128
1.872	-0.18825
1.6367	-1.2683
1.6983	1.6379
1.6687	-1.9713
2.2244	-1.6696
2.027	1.2056
1.6602	1.3426
1.7327	1.1001
1.555	-0.19509
1.8335	0.95999
1.7632	-2.0372
1.6672	-0.57341
2.0936	0.17702
3.0883	0.74177
3.0268	0.38628
3.6865	0.46532
3.3891	-1.9383
2.2774	0.38389
2.3667	1.2342
2.679	0.84758
2.2292	-0.064468
1.941	-1.1944
2.0098	-0.28419
0.91919	0.90306
1.8598	0.34022
1.8534	1.2966
1.3442	-0.36881
1.4031	-0.98706
1.3736	0.75181
2.7449	-2.1538
2.7066	-0.48159
4.215	-3.9722
3.5329	0.94709
3.0483	0.9257
1.5097	0.63396
2.6764	0.65162
2.6627	0.047148
2.3719	0.23979
2.2358	0.050736
2.9875	-0.095779
4.9981	0.52487
4.9943	-0.070049
5.2236	0.68158
3.3042	0.014236
3.0601	0.90345
3.0535	0.43355
2.4698	-0.029459
2.5868	-1.6971
2.2024	0.86582
1.3861	-0.17305
1.3798	0.68253
2.1377	0.36664
1.8273	0.65165
2.2008	0.6748
1.5442	0.66116
1.7202	0.16245
1.4713	-0.2722
1.3782	0.12988
1.6035	-0.47261
2.3096	0.48414
1.576	-1.6121
3.1	-1.1877
1.7028	-1.5007
1.6529	0.44192
1.9244	0.8684
1.855	0.17399
1.4489	0.22521
1.8757	0.21115
1.8989	0.84295
1.8959	0.097349
1.9776	-0.35511
1.5307	0.004329
1.6483	-0.37696
2.3359	-2.0845
2.0972	0.35586
4.1924	-0.19442
3.395	0.050638
4.5945	0.16299
3.7329	0.86781
1.9879	0.8416
1.5463	-2.9436
1.3584	-1.4447
2.403	-0.64749
1.857	0.91119
2.0802	0.78003
1.4393	-0.89027
2.2431	-0.2085
1.7062	0.60327
1.7638	0.90235
2.7297	1.2294
2.0836	0.19007
1.8263	-0.029076
1.6633	-1.3901
1.2047	-1.9968
1.4265	-0.46427
1.487	0.71173
1.5227	-0.14033
1.8304	2.1168
1.8641	1.1434
3.5707	-0.18972
2.1012	-0.020524
1.4679	-0.11722
1.6417	1.0287
1.5951	1.1903
1.4875	1.0372
1.7064	0.72895
1.9517	1.0308
1.2083	0.90426
2.0099	1.343
1.5213	-0.38191
2.106	0.77204
1.7966	0.61249
1.9999	-0.033754
2.23	-0.4506
1.9787	-0.17024
2.7124	-1.7284
1.835	0.14595
1.9343	-1.6654
2.1279	0.28668
1.8981	0.37068
4.0305	-0.13586
2.7344	-0.1251
1.815	-0.05077
2.9168	0.43394
1.7627	0.83468
2.1054	-0.27149
1.4608	-1.1414
1.5939	0.20497
2.4334	0.91081
1.2737	-1.7508
3.6961	-0.78256
4.7185	-1.1637
2.1431	-0.089244
4.1015	0.93622
5.1916	1.1298
2.951	0.58966
3.1345	0.85467
3.7408	0.62309
2.3779	-2.375
2.325	0.88282
4.3424	1.1941
5.3133	0.85708
3.6812	0.81983
2.5291	0.38718
1.5545	0.34308
2.9648	-0.12006
2.8936	-0.42617
4.7599	-0.56166
3.2794	-0.98206
4.7942	-0.85888
7.378	-0.99612
7.914	-1.2357
5.6275	-1.0619
3.8404	0.36639
6.0228	1.2919
7.3743	-0.2937
9.0085	0.046751
8.6238	0.17545
7.0672	0.61673
4.2129	0.55055
6.3558	1.6519
5.3032	-0.3629
1.8155	0.10271
2.094	0.069194
3.2877	-0.86657
4.9517	-1.0095
2.6118	1.2049
2.0672	-1.6789
3.1493	-1.8648
2.5563	0.12454
2.5642	-0.48765
1.8105	-0.562
1.592	0.23529
2.0491	0.069418
2.0781	-0.0537
1.2045	3.0273
2.0096	-0.4549
2.1423	0.16081
2.118	-0.33428
2.446	-0.38516
1.9709	-0.77864
1.8671	-0.83019
2.271	-0.95599
2.1121	1.2252
1.8967	-1.9062
2.1958	-0.97512
4.8621	-0.64657
1.6556	-1.1473
1.4059	0.3857
1.8725	0.58766
4.9136	-0.66336
4.7726	-1.4316
3.2272	-1.7113
1.6252	-1.2917
2.6955	-0.48041
2.9905	0.52793
2.7887	0.045193
1.6912	0.5897
2.9912	0.99869
3.792	1.3728
1.8174	1.1578
2.6779	0.45077
1.7757	1.2219
2.019	0.76825
1.9875	1.0987
1.058	-0.3709
2.6422	0.060386
1.5201	-0.27764
1.3081	0.40928
1.2134	-0.97545
4.0521	1.5441
1.6696	1.0735
1.9174	0.75852
2.1271	-0.7651
1.4382	-0.60069
2.0294	-2.155
2.8045	-1.891
1.7168	0.48203
2.0549	0.16948
2.1212	0.65497
1.8881	1.0794
3.3886	0.79741
1.7334	0.19314
1.7413	0.36175
1.4347	0.50048
1.0248	-0.20061
0.95047	-0.61692
1.1888	-0.5556
1.7741	0.46183
1.1005	-0.78518
1.1201	-0.1646
1.0294	3.0751
1.302	0.27623
0.93262	-0.32408
1.8242	-0.50527
0.89466	-0.18952
0.76447	-0.43852
0.74813	-0.12331
0.73267	-0.60726
1.0437	-0.58569
1.1766	-0.67162
0.7372	-0.47224
1.4104	-0.56608
0.86216	-0.48368
0.80398	-0.59182
1.746	2.2298
1.5514	2.2585
1.208	-0.3681
1.0106	-0.77755
0.90729	-0.59423
1.2413	-0.73669
0.80306	-0.68554
1.1236	-0.7059
0.84955	-0.50234
1.1007	-0.0058223
1.0229	-0.15229
1.5128	-0.59764
1.0126	-0.028773
0.90839	1.2546
0.79839	1.8889
1.0224	1.5918
0.94668	-0.0066371
0.49607	0.22943
0.73233	0.35902
0.85858	-0.9123
0.65917	0.094725
0.71938	0.55447
0.79802	0.9268
0.94833	1.0231
0.58783	0.065698
0.62951	1.0391
0.81047	0.42267
1.1643	0.96664
0.60998	0.39938
0.63251	-0.61934
0.75097	0.13829
0.96125	-1.5636
0.79046	-2.045
1.0228	-1.8451
0.9936	-2.5477
0.63682	-0.056058
0.88754	0.65023
0.60013	0.3911
0.7621	0.17125
0.76289	1.0216
1.5201	0.27266
0.71801	0.86963
3.7475	1.189
4.6106	1.1123
6.0656	1.7986
5.5586	-0.43042
5.0045	-1.0659
4.4142	0.23262
4.0692	1.2843
3.1642	-1.2298
3.1216	-0.45405
1.9845	-1.1536
1.1987	-1.7533
1.1773	0.28124
1.8223	1.3623
1.6847	1.0367
1.1487	-1.6406
2.1295	-0.38123
2.4374	-1.379
3.4467	-1.1157
2.6951	0.885
3.0285	-0.53914
3.4929	-0.55504
4.4284	0.16036
5.3089	0.6045
4.8225	0.83431
4.6325	0.61464
4.1808	-0.37468
1.5696	-1.5129
2.5957	-1.4598
2.9019	0.64322
1.861	0.55714
1.791	1.1331
2.8892	0.51355
1.5232	0.43125
3.524	0.045926
2.6565	0.32508
1.7065	-0.37271
0.95771	1.4624
0.80742	0.24787
0.66134	-1.2879
1.0429	-0.049674
2.2108	-1.156
2.7333	0.44041
1.4019	-0.24049
1.9554	0.41077
2.8618	-0.69695
2.9835	1.5448
3.3908	-1.1568
4.1799	-0.54598
3.9792	-0.15222
4.6561	-1.6949
3.8139	0.03688
3.1411	-0.47453
3.897	-1.1477
4.4513	-1.3584
4.705	0.061878
4.4809	0.16716
4.0015	0.070639
3.3636	-0.6186
3.5352	-0.16867
5.3475	0.76538
2.9074	-0.64833
2.8664	-0.57101
3.2325	0.88353
3.1962	1.1532
2.3192	0.063718
1.8425	1.0719
1.2709	-0.99582
1.8731	1.0735
1.7673	-1.5781
2.1666	-0.39893
1.3914	-0.14173
1.7211	-0.66664
3.6864	1.0342
2.8831	-0.40396
3.6944	-0.73418
2.6941	-1.5688
3.7185	1.7925
3.0853	2.5277
3.1469	1.6102
2.3477	2.2264
2.2816	-0.10887
1.4668	0.79125
2.3286	0.31802
1.9636	0.67011
1.2694	-0.067823
1.5979	-0.68126
2.2519	0.27764
1.3649	-1.0151
1.2649	1.1983
1.1269	-0.13402
2.0986	0.78538
1.3931	0.28696
2.8966	0.20685
2.2245	0.6939
2.222	-0.27956
1.7089	-0.17819
3.4712	0.044352
4.655	-0.069456
5.7194	0.33429
4.8349	-0.055377
4.2595	0.11352
3.9833	-0.39375
5.9226	-0.48083
5.1045	-0.6704
4.0785	-0.53622
2.7119	0.11428
1.6915	0.41391
1.3577	0.11398
1.6759	-0.75025
3.2495	-0.38988
1.3315	0.084781
2.1546	-0.10036
6.1369	-4.1971
2.9484	-0.80255
3.3966	-0.71817
1.8798	-0.42826
1.4116	-0.028261
2.8565	-0.96108
3.8508	-1.2438
3.1449	-1.1889
1.5099	-1.1921
3.1045	-0.16697
1.5811	-0.2678
2.0459	-1.4595
3.3986	-0.076558
1.8225	0.7326
2.9647	0.4276
3.2507	0.715
3.4511	0.28508
3.5061	0.50694
3.1945	1.0538
4.1187	0.9812
3.5292	0.93462
1.6586	1.2941
3.877	0.074607
2.2322	0.85852
4.4437	-3.134
1.5518	0.23668
1.9571	-0.21181
1.4276	0.98234
1.5001	1.0106
1.7465	1.558
2.0989	1.0115
2.9129	0.84638
1.9833	0.93045
1.8585	1.2846
1.5416	-0.19404
1.1083	0.39133
2.3705	0.56044
1.3598	0.87065
1.4363	0.97293
2.4982	0.78036
1.277	1.0275
2.3294	0.28128
1.6467	1.1622
1.276	1.0783
1.4531	1.1758
1.061	1.1408
3.0394	0.85485
2.5974	0.87643
1.5859	0.9004
1.3537	0.90046
1.4194	1.0231
2.5902	0.68435
3.2896	0.97443
4.1395	0.66621
3.3431	0.63609
3.7086	0.65844
4.853	0.51386
3.961	0.62385
5.6187	0.51388
1.4088	-0.54895
2.2644	-0.61929
3.7237	0.15856
5.1417	0.53881
6.0748	0.55198
5.0239	0.52611
4.8167	0.54722
3.7683	0.78788
1.7292	0.74964
1.5486	0.42793
5.349	0.54364
4.7907	-0.5427
3.4051	-1.3074
1.2135	-0.44049
2.3525	-0.90364
4.1086	-1.9579
3.1698	-1.3734
5.167	-0.27033
3.3828	0.32569
1.7243	0.099541
4.7068	-0.71542
5.1628	-1.8805
5.7058	-1.4228
5.0009	-0.051987
3.5699	-0.15613
1.7849	-0.21879
2.1766	-1.3586
1.6458	-0.94629
2.8018	-1.5396
4.8675	-2.0208
3.6674	-1.906
6.4074	-2.1581
4.6793	-1.9916
1.7937	-2.1315
2.5017	-2.5322
5.4503	0.085173
3.3195	0.60368
1.4803	0.22047
3.011	0.60258
3.2392	0.62218
4.6737	0.31444
5.5373	0.20249
5.6382	0.37536
4.5503	0.12639
5.8217	0.40488
6.5202	0.64281
8.2339	-2.0224
6.4502	0.016828
4.7203	0.4496
4.2778	0.58772
3.1204	0.6664
2.2563	0.74868
2.9739	0.66154
2.6869	0.48978
2.2367	0.94958
4.4236	0.16314
4.7653	0.78207
6.107	0.39571
7.8023	0.32844
7.4218	0.41154
6.6396	-0.30173
7.6166	-1.1398
6.4461	0.43627
7.0501	-0.32848
7.9519	-2.8316

## Sheet: FigE6b
Distance to nearest archaea (um)	Normalized bacterial activity
2.5727	1.9229
3.695	1.0925
4.8203	1.4743
4.1855	1.6967
5.7864	1.6157
6.0941	1.8042
5.3838	-1.1728
3.1831	-0.42367
4.3176	-0.97745
3.7726	-0.32689
3.3767	-0.16735
5.1527	0.83507
3.9802	1.1049
4.4416	1.8545
3.0579	0.87374
2.4298	1.3506
1.8536	1.6808
1.5932	0.3327
3.6587	0.3631
1.9058	-0.081485
2.751	0.64188
3.0022	0.19119
3.7494	0.65698
4.2227	0.35225
1.8028	1.2154
1.3917	-0.35184
1.2716	0.14137
1.4317	-0.27117
1.3322	-0.56062
1.2506	-1.0586
1.1767	-1.1878
2.1467	-1.5801
2.6671	-0.66056
1.2516	-0.1769
2.0076	-0.28872
2.1176	-0.26527
3.1125	-0.81328
2.3673	-0.54954
2.3671	0.44256
1.3992	0.58576
1.7115	1.4613
1.4583	-0.27531
2.1801	0.85258
1.6012	0.20067
2.3211	0.09576
0.94117	0.35918
1.1592	-0.27783
2.0704	-0.20409
2.047	-0.96304
4.4104	-0.79092
4.0738	0.020998
2.6852	-1.0329
4.1166	-1.351
2.9067	-0.90303
3.8071	-0.54462
3.4585	-0.83805
2.1217	-1.2719
1.127	-2.0059
3.0168	0.059261
4.2299	-2.1554
3.3017	-1.7193
1.4777	0.097969
1.4627	-1.3925
1.5953	0.62942
2.5336	0.50871
5.1129	0.12481
4.3517	-1.8343
4.0922	0.14198
2.9437	-0.75513
3.4947	-1.637
2.0832	-1.6809
2.7113	-0.44324
1.4938	1.5308
1.4329	1.6421
1.4302	1.693
1.7539	2.0608
2.3021	-1.3413
1.4857	0.3596
2.0495	-0.76967
1.3671	0.92689
2.0512	-0.066153
2.0928	0.61952
1.6154	0.013011
2.1139	0.11092
1.5189	0.27058
1.4814	0.54664
2.2747	-0.51365
2.3009	-1.07
1.8461	0.60026
3.0815	0.36153
2.2924	-1.5542
3.1842	0.047023
4.2089	0.55583
2.1357	-0.31831
1.7797	0.48097
1.791	0.64172
1.7078	-0.94171
1.6231	0.53238
2.0687	-1.5561
2.0121	0.20627
1.9635	1.4024
3.039	0.28144
3.8298	0.35377
1.6936	-0.067756
1.6606	0.48013
3.8101	-1.5952
2.0563	0.28507
2.1343	0.095255
2.5083	-0.82561
3.5427	0.017016
5.4426	0.70119
3.6992	0.92114
3.035	1.0345
4.5068	0.96627
6.2594	1.0583
6.022	0.70381
7.6755	0.67196
3.5169	0.66232
6.6058	0.73098
4.6051	0.87324
3.8842	0.69629
2.9415	0.10117
5.5591	0.74952
6.5078	0.72116
4.1916	0.74137
2.0414	0.11414
5.4341	0.14957
4.3396	0.42173
3.722	0.2248
1.9693	-0.22883
2.6733	0.16939
3.9288	0.35499
4.5945	-0.12265
2.9121	-1.7347
4.5081	-0.41692
2.8024	-2.1363
2.9586	-3.2174
4.2951	-1.3202
2.713	-3.2623
3.6576	-0.71038
3.4429	0.031676
2.1943	-1.3322
2.3618	0.2271
3.6097	0.23801
5.0081	-0.029463
3.771	0.44863
5.6908	0.012642
4.6932	0.34202
6.1235	0.40294
5.8069	0.30939
5.7016	0.19283
7.0043	0.25152
2.09	0.41728
3.4078	-2.0576
3.074	-0.63075
1.9757	0.53699
2.5461	0.38651
2.0654	0.53617
1.6621	0.39485
1.5832	-0.20364
1.4994	0.63322
1.7958	0.67396
2.0161	0.037712
3.0789	-0.14306
3.2008	-0.32511
2.3172	-2.3467
3.6135	-1.4505
2.1784	0.7167
2.6231	-0.61664
1.757	1.392
1.4692	1.4556
1.7928	0.37782
1.4937	1.1251
1.5374	0.70321
1.4763	-0.29503
1.7817	-1.3181
1.6838	-1.1957
1.6102	-0.32435
1.3549	-0.012904
1.9789	0.8677
2.1149	-0.057549
1.6739	-0.26865
1.7611	-1.2934
3.8594	-0.18296
3.5065	-0.10315
2.2199	0.16048
1.6334	0.13019
1.9444	0.76247
3.3807	0.52946
2.8345	1.3133
1.7549	0.93437
1.6771	-0.93065
1.7898	0.83466
2.8092	0.49243
1.6243	0.35246
2.1035	-1.5655
1.9235	0.64205
1.5398	1.3736
1.4934	0.038313
1.0784	-0.34469
1.5277	-0.68026
1.7413	-0.37389
1.1591	-0.30841
1.42	0.16844
1.264	0.14997
1.298	1.3509
1.212	1.2585
2.0289	1.6778
1.5242	0.60098
2.1047	0.64947
2.5564	0.8752
2.3083	1.2235
2.2599	0.75068
1.1824	-0.50204
2.5717	1.2477
1.9883	0.64252
1.6055	1.0256
1.7649	0.41233
1.7114	0.19943
1.6768	0.58382
1.9968	0.67086
1.8824	-1.5974
3.2415	-1.9955
2.3214	-2.091
1.5393	-1.8642
2.841	-0.92468
1.914	-0.35623
1.6013	-0.50222
1.7739	-2.2058
2.1421	-2.2667
2.0818	0.28145
2.151	-0.25286
2.7385	-0.1273
2.8168	-0.62376
1.6367	-0.75391
1.872	-0.78215
2.1187	-0.62471
2.5748	1.6971
1.5587	0.63599
3.2225	1.4465
2.588	0.45985
2.3772	0.37802
1.9587	1.2665
3.1915	-0.14333
1.6983	1.2379
2.1321	-0.64892
2.9345	-2.9084
2.2022	-0.024844
2.9121	0.58446
2.9878	-1.3097
4.4961	-0.079781
4.8687	0.48643
2.5564	-0.021235
2.0738	-0.0029076
2.9129	0.25885
3.6486	0.2729
3.5273	0.86755
3.9936	-1.7385
5.2387	0.19725
1.941	-1.31
2.4664	-1.6563
1.7632	-1.3086
4.2433	-1.287
1.7785	0.18614
2.4396	0.69516
3.7769	-1.6049
5.8381	-1.5562
3.534	-1.3532
6.2619	-1.24
6.7568	-1.0371
5.8109	-1.1066
4.9029	-1.096
3.6408	-1.2919
5.5017	-0.93028
4.0085	-1.3073
4.1606	-0.46883
4.1793	-0.7753
2.8491	-0.41579
2.1876	0.6978
2.9145	-0.72385
2.5868	-0.068844
2.8256	0.64133
2.0112	1.1885
1.5472	1.2961
2.2896	-0.64959
2.0098	0.82339
2.2774	0.8803
2.7014	0.36484
3.431	-0.1749
2.7807	-0.80637
2.4999	-0.84322
1.6672	1.1716
1.6339	1.3491
3.601	-0.87832
2.1137	-1.5029
2.3421	-0.66191
1.6687	-0.58471
2.1253	-1.0892
2.5984	-0.021601
2.7686	-1.5356
2.6627	-1.599
3.2487	-1.6465
2.2358	0.87605
2.9496	1.0232
1.555	1.6947
1.5097	1.1562
2.9515	0.95948
2.0945	0.84149
2.3923	1.5478
1.3442	1.4725
2.0123	0.014159
2.027	1.623
1.8598	1.0109
1.8534	0.14686
1.3736	1.6476
1.3798	1.4703
0.91919	1.8737
3.0513	-0.31894
1.6529	0.98144
1.4489	1.323
1.3782	0.36972
2.1329	0.20239
1.5442	0.16944
1.4713	-0.032961
1.576	0.27995
2.2548	-0.16076
2.2318	-0.13548
1.6035	1.3729
1.6483	1.1764
1.9671	-0.6426
2.2849	-0.36651
1.9776	1.0424
2.0692	-0.55072
1.7028	0.0818
1.7202	0.15365
2.5908	-0.08449
1.855	0.91477
1.9301	0.98504
1.8959	0.43617
1.8989	0.96565
3.1559	-0.41148
2.7724	-0.33123
2.1715	0.59219
3.3148	1.1643
2.2385	-0.77201
2.0058	-0.43094
2.8272	-1.0748
4.2579	-1.444
2.5229	0.38409
1.3861	-0.65796
1.8273	-0.087942
1.8696	0.78718
3.9867	-1.4696
1.9879	0.33353
2.7623	0.77274
2.0972	0.3633
1.7336	-1.0516
1.3584	-0.85019
1.4393	-0.46518
1.7772	-0.96464
1.5227	-0.72528
2.0368	-0.44075
1.2047	-0.85818
1.7835	0.68019
1.4265	0.23185
1.5951	1.181
1.9564	1.3793
1.7064	2.8672
1.9115	-0.47726
1.7805	-0.10459
1.2083	0.84408
1.7619	1.7164
1.8304	-0.43087
1.4875	1.0261
1.8641	0.25328
1.7627	-0.62916
1.8841	-0.13156
1.4608	1.1075
1.3911	-1.0036
1.5213	-0.99823
2.2479	-0.89727
2.4583	-0.82247
1.2737	-0.45601
1.5939	0.019814
1.5545	-0.97366
3.0596	1.2221
2.5291	0.38931
2.325	-0.63779
2.6118	-1.8141
3.4787	-0.89391
2.6576	0.37265
2.0672	0.31421
2.359	0.49553
2.094	0.40023
1.8155	1.1254
4.3891	-0.44905
2.324	-0.23726
2.8956	0.60582
2.0096	-0.51016
2.1083	-0.19297
2.1527	-0.19664
2.1121	-0.084055
2.5642	-0.51688
2.5563	-0.14477
2.0491	3.1388
1.592	-0.66676
2.018	-0.11207
3.4121	-0.41615
5.0266	-0.049649
3.0504	-0.48334
2.0775	-0.35541
1.8105	-0.021819
1.2045	2.5877
3.3088	-0.57801
3.0698	-0.6741
1.8671	-0.64321
1.6252	1.2517
1.058	0.83248
1.905	-0.98
1.9344	-0.71723
2.1271	-1.2172
1.4382	-1.0814
1.7168	-1.3028
2.5148	-1.3894
1.6696	-0.49532
1.6746	1.1731
1.7334	-0.96797
1.7413	-0.37998
2.4839	-1.1249
1.4347	0.57632
2.0199	0.56483
2.2264	1.597
1.4059	1.0684
1.6635	-0.25843
1.6556	-0.98876
1.9899	1.4572
2.5058	1.9783
1.8881	0.26038
2.9104	1.5053
3.1054	0.69369
2.5109	-0.85004
2.4699	0.84446
1.3081	0.61029
1.5736	-0.34088
1.2134	0.72924
2.1672	-0.56494
1.8967	-1.3733
1.5827	-0.40614
1.9489	0.08951
2.9836	-0.95795
2.0294	0.16451
1.1888	0.59863
1.5539	0.3336
0.78149	0.41685
0.74813	0.70167
0.73267	-1.7687
1.3272	1.0883
0.90729	-1.9551
1.1852	-0.27071
0.80306	1.0398
1.0224	0.17989
1.1722	-1.6479
0.7372	-0.93656
1.5444	0.48375
0.84955	-0.16434
1.0884	-0.54932
1.0229	0.3622
0.95047	0.58661
0.79839	0.66461
0.90839	1.4111
1.0248	0.78831
0.80398	-1.3628
0.58783	-0.85458
0.49607	0.58344
0.66171	1.0394
0.65917	0.82091
1.0242	-0.9213
0.9071	0.20781
0.75097	1.0337
0.94833	-1.4265
1.6733	-2.1328
0.81846	-0.70031
0.60998	-0.84161
0.81047	-0.12578
0.71801	0.1886
0.81006	0.16492
0.60013	0.70147
1.1357	1.0368
0.63682	-1.0344
0.62951	0.84523
0.79046	1.415
1.1987	-1.3979
2.2008	0.32106
2.9587	0.77226
3.5431	0.6767
1.9412	0.23219
1.1773	-0.08584
2.5795	0.96123
3.4317	0.81896
2.43	0.6302
1.4589	0.88243
1.1487	0.50496
3.7917	0.91963
3.2221	0.79879
3.4041	0.80565
2.4639	0.87886
1.8677	0.57496
1.731	0.52118
1.5696	0.41721
2.1593	0.62492
2.8286	0.53462
1.861	-1.5251
1.791	-1.4441
2.8926	-1.5055
2.2872	-1.497
2.925	-1.3889
1.5232	-1.4927
2.1496	-1.5388
0.80742	0.93945
0.97285	0.28674
0.66134	-1.8454
1.1935	1.0683
2.0152	0.86428
1.0429	-0.58542
0.95771	0.92024
1.6382	-1.1808
1.3241	-0.078005
1.2926	-0.38936
1.2709	0.80469
1.8122	-0.50294
1.3914	-1.4921
1.8804	1.0934
1.8358	-0.53237
1.4668	-1.4836
1.7211	-0.18246
2.0303	0.48471
1.3649	0.67195
1.5979	-1.0056
1.2694	1.3572
2.0072	0.78726
1.5099	-1.1714
1.3577	0.050838
1.3315	-0.68939
1.7089	0.3044
1.9506	-0.59796
1.1269	0.77434
1.6586	1.1432
1.3931	2.2457
1.6499	1.0068
2.1474	-0.44362
1.5654	-0.19635
2.9362	-1.7158
1.5401	0.10165
1.4276	-0.077148
1.5518	-0.73532
1.7849	0.12851
1.7243	-0.3144
1.5486	-0.68674
2.471	0.80516
1.8816	-0.62204
1.7292	0.082557
1.8962	-0.014281
1.4194	0.35779
1.4758	1.0181
1.9717	0.80263
2.1624	0.62861
3.2166	-0.55302
2.8897	-0.45507
2.9995	-0.063307
3.6369	-0.72509
3.9616	-1.2592
3.544	0.15433
4.5817	0.7303
5.0837	0.038101
4.805	-2.3563
4.904	-0.83921
3.9297	0.37027
5.4742	-2.0044
2.6992	0.90208
3.6257	0.07518
3.5897	-0.39467
3.0925	-0.93234
4.3518	-1.1614
5.0766	-0.7446
4.1116	-0.70228
2.9587	-0.65834
2.1042	-0.22062
2.9138	-0.95951
1.6458	-0.36209
2.7656	0.15881
4.43	-0.52289
3.7211	-1.0526
3.1547	-1.8752
2.4411	0.037279
3.5037	-0.92153
1.3537	0.15793
1.7679	0.4629
1.5859	1.6572
2.3862	1.2151
3.278	-0.58883
3.2278	0.69779
2.9876	0.51203
2.0557	1.3873
1.061	1.108
2.6377	0.41107
2.2995	1.3931
1.4171	1.6657
2.1568	1.8179
1.276	1.8516
1.985	2.0248
3.0453	1.0197
1.6179	-0.33827
4.2976	0.27041
3.3293	0.77713
2.1855	0.80167
3.369	0.7994
2.0647	0.31439
4.7154	-2.1647
1.277	0.51565
2.0524	1.1608
3.1911	0.27317
4.3232	-0.4184
4.4583	-0.7199
4.4359	0.23994
2.7232	1.4102
3.6359	0.074261
2.7291	0.76384
1.4363	-0.2935
2.8709	-0.85901
1.9836	0.23963
1.3598	1.8023
3.7294	-0.10972
1.1083	-0.28097
2.206	-0.34288
2.0142	-1.529
2.9946	-1.724
3.7336	-0.45413
3.1275	0.96943
3.1055	1.0019
1.9044	-1.3245
2.5179	-0.37181
1.5416	-0.47189
2.4821	0.41585
2.6836	1.1834
1.866	-1.9883
1.4088	-0.60439
2.4411	0.83058
1.8379	-0.04429
1.2135	-2.4863
2.3053	0.39942
3.1768	1.1627
3.4851	1.1518
1.4803	-1.1467
3.7001	-0.94693
2.2367	1.0095
2.6163	0.29041
3.6908	-0.92228
4.8788	-0.99808
